# Supplementary material for: Self-assembling bolaamphiphile-like collagen mimetic peptides
Source: Royal Society of Chemistry journal article supplement (doi:10.1039/c8nj00119g), 2018-01-01
Supplement: c8nj00119g1.pdf [file c8nj00119g1.pdf]

## Supporting information

### Self-assembling bolaamphiphile-like collagen mimic peptides

Linyan Yao, Manman He, DongfangLi, Huanxiang Liu, Jiang Wu, Jianxi Xiao

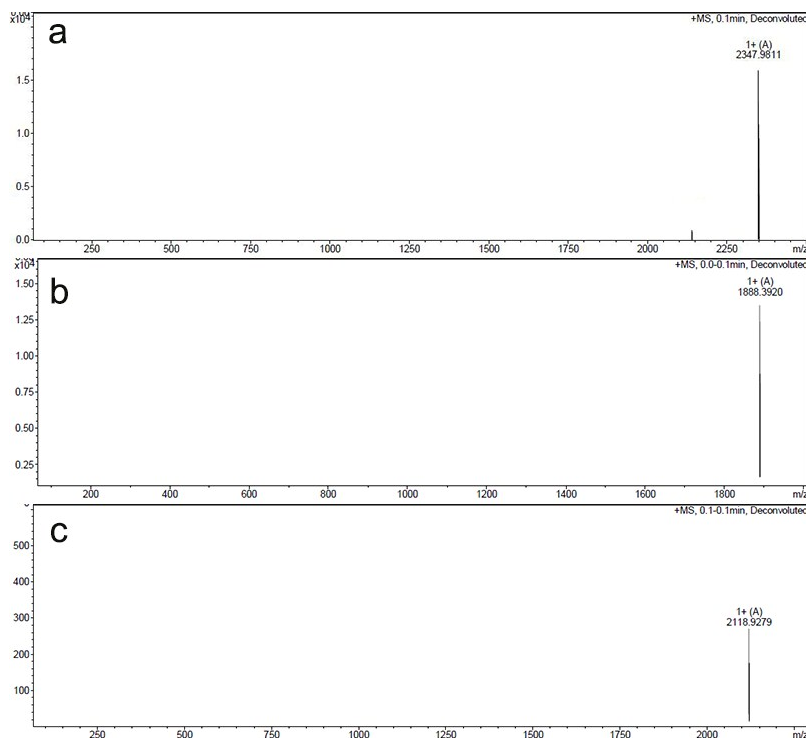

**Figure S1.** Mass spectra of collagen mimic peptides:  $D_2(GPO)_7D_2$  (a),  $(GPO)_7$  (b) and  $D(GPO)_7D$  (c). m/z calculated 2349.5  $[M+H]^+$  for  $D_2(GPO)_7D_2$ , found 2348.0  $[M+H]^+$ ; m/z calculated 1889.1  $[M+H]^+$  for  $(GPO)_7$ , found 1888.4  $[M+H]^+$ ; m/z calculated 2119.3  $[M+H]^+$  for  $D(GPO)_7D$ , found 2118.9  $[M+H]^+$ .

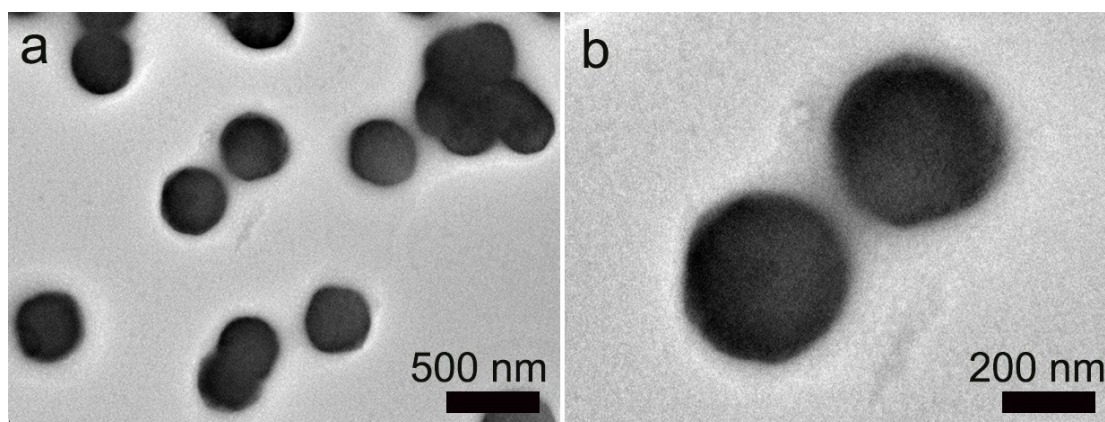

**Figure S2.** TEM images of peptide  $D_2(GPO)_7D_2$  in 100 mM HEPES buffer with 100 mM NaCl at pH 7.0.

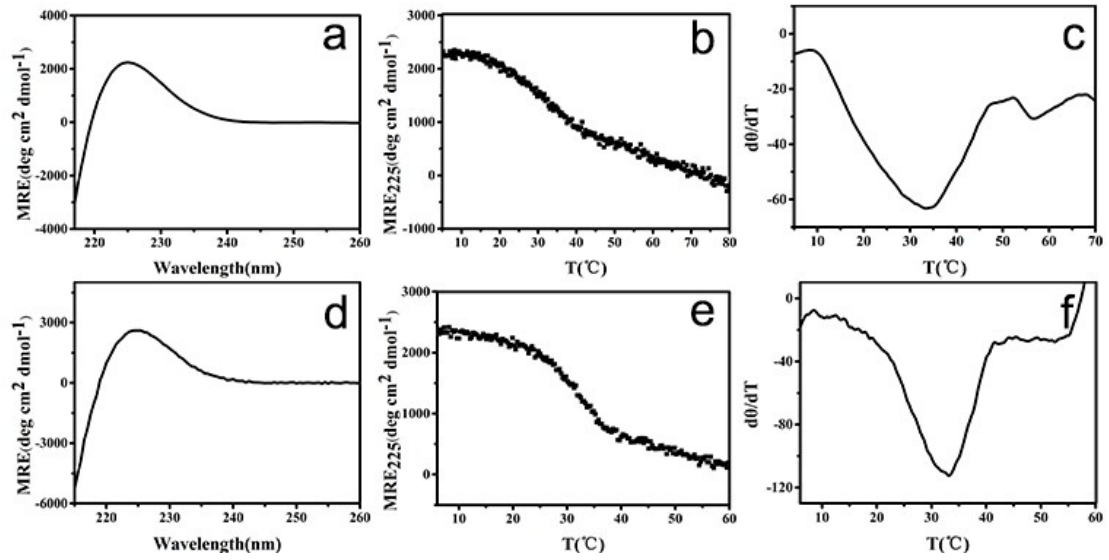

**Figure S3.** CD characterization of collagen mimic peptides  $(GPO)_7$  (a-c) and  $D(GPO)_7D$  (d-f). CD spectra (a, d), CD thermal unfolding (b, e) and the first derivative ( $d\theta/dT$ ) of the CD unfolding curve (c, f). Peptide solutions with a concentration of 400  $\mu$ M were prepared in 10 mM phosphate buffer at pH 7.0.
